# Supplementary material
Source: publisher site journal article supplement (https://www.dovepress.com/get_supplementary_file.php?f=485102.xlsx)
Supplement: Supplementary file 1 [file get_supplementary_file.php]

## Sheet: Supplementary Table 1
Supplementary Table 1. Demographics and clinical characteristics of study patients.
Characteristic	mNGS group (n=78)	Control group (n=383)	P-value
Age, median (IQR)	64 (51-72)	65 (54-74)	0.271
Sex, n (%)
Male	60 (76.92%)	248 (64.75%)	0.047*
SOFA score, median (IQR)	5 (4-7)	9 (5-12)	<0.001***
Site of infection
Respiratory	52 (66.67%)	230 (60.05%)	0.309
Genitourinary	6 (7.69%)	87 (22.72%)	0.002**
Skin and Soft Tissue	3 (3.85%)	21 (5.48%)	0.781
Bloodstream	16 (20.51%)	137 (35.77%)	0.009**
CNS	7 (8.97%)	5 (1.31%)	0.001***
Gastrointestinal	9 (11.54%)	161 (42.04%)	<0.001***
Underlying diseases, n (%)
Hypertension	38 (48.72%)	135 (35.25%)	0.029*
Diabetes	28 (35.90%)	153 (39.95%)	0.528
CAD	18 (23.08%）	102 (26.63%)	0.573
CKD	13 (16.67%)	38 (9.92%)	0.111
Biochemical indicators
WBC	12.22±9.28	12.71±8.72	0.659
NE%	61.85±39.07	83.25±15.04	<0.001***
LY%	9.30±15.68	10.53±12.12	0.438
Hb	104.53±28.05	105.54±29.46	0.779
PLT	154.47±94.05	166.81±105.68	0.339
Cr	184.99±150.30	225.94±212.34	0.105
ALT	101.13±258.51	206.40±705.51	0.194
LDH	539.65±798.83	756.59±1694.07	0.269
PCT	21.31±37.38	35.56±49.26	0.016*
CRP	112.50±105.41	156.53±124.06	0.004**
Outcomes, median (IQR)
Hospital length of stay (days)	20 (10-35)	14 (6-23)	<0.001***
ICU length of stay(days)	10 (7-19)	6 (3-10)	<0.001***
Mortality (%)	28 (35.90%)	197 (51.44%)	0.013*
Duration of Antibiotic Exposure (Days, IQR)	2 (1-7)	——	——

## Sheet: Supplementary Table 2
Supplementary Table 2. Microorganisms identified and antibiotic adjusment in the mNGS group.
No.	Gender	Age (years)	Blood mNGS		BALF mNGS		CSF mNGS		Sputum mNGS		Hydrothorax and ascites mNGS		Pus mNGS		Blood culture		BALF culture		CSF culture		Sputum culture		Hydrothorax and ascites culture		Pus culture		Other culture		Whether the antibiotic was adjusted	Antibiotic adjustment status	Type of antimicrobial
			Sampling time	mNGS results	Sampling time	mNGS results	Sampling time	mNGS results	Sampling time	mNGS results	Sampling time	mNGS results	Sampling time	mNGS results	Sampling time	Culture results	Sampling time	Culture results	Sampling time	Culture results	Sampling time	Culture results	Sampling time	Culture results	Sampling time	Culture results	Smapling time	Culture results
1	male	86	2023-04-08	negative	2023-04-10	Corynebacterium striatum, Klebsiella pneumoniae									2023-04-08	negative	2023-04-10	Klebsiella pneumoniae, Candida tropicalis											Yes	Same level replacement	β-lactam
2	male	72	2023-03-16	Escherichia coli											2023-03-15	negative	2023-03-16	Escherichia coli											Yes	Same level replacement	β-lactam
3	male	63							2022-12-20	Human parainfluenza type 2, Haemophilus influenzae					2022-12-15	negative					2022-12-15	negative							No		β-lactam
4	male	77	2023-03-14	Streptococcus contellatus									2023-03-14	Enterococcus avium, Streptococcus contellatus							2023-03-14	Klebsiella pneumoniae			2023-03-14	Enterococcus avium, Streptococcus contellatus			No		β-lactam, Glycopeptide
5	male	57	2022-05-07	negative	2022-05-07	Enterococcus faecalis, Klebsiella pneumoniae, Mycobacterium tuberculosis complex, Cytomegalovirus	2022-05-07	negative							2022-05-06	negative	2022-05-06	Klebsiella pneumoniae	2022-05-06	Stenotrophomonas maltophilia									Yes	Same level replacement	β-lactam, Triazole antifungals
6	male	14	2022-12-06	negative											2022-12-05	negative													Yes	Same level replacement	β-lactam
7	male	80	2023-03-02	Acinetobacter baumannii, Cytomegalovirus	2023-03-04	Acinetobacter baumannii, Candida glabrata									2023-03-01	negative	2023-03-01	Acinetobacter baumannii											Yes	Same level replacement	β-lactam, Triazole antifungals
8	male	87	2022-11-07	negative	2022-11-07	Klebsiella pneumoniae									2022-11-06	negative					2022-11-06	Candida albicans					2022-11-06	urine: negative	Yes	Same level replacement	β-lactam
9	male	10					2022-07-15	negative							2022-07-18	negative					2022-07-11	Streptococcus pneumoniae, Acinetobacter baumannii							No		β-lactam, Antiviral agent
10	male	28			2023-05-17	Cytomegalovirus, Human Immunodeficiency Virus 1, Pneumocystis jirovecii									2023-05-14	negative	2023-05-14	negative											No		β-lactam, Antiviral agent
11	male	55	2022-06-23	negative					2022-06-23	Corynebacterium striatum, Streptococcus pneumoniae					2022-06-20	negative											2022-06-23	urine: Candida tropicalis	No		β-lactam, quinolones, Imidazole antifungal drugs
12	male	71	2021-06-17	Staphylococcus aureus, Aspergillus terreus, Aspergillus fumigatus											2021-06-17	negative													Yes	Same level replacement	β-lactam, Quinolones
13	male	32					2022-11-25	Burkholderia gladioli							2022-11-21	negative			2022-11-23	negative									Yes	Same level replacement	β-lactam
14	male	39					2022-07-23	negative																					No		β-lactam
15	male	70	2022-02-02	Pseudomonas aeruginosa, Mycobacterium tuberculosis complex													2022-02-04	Pseudomonas aeruginosa											Yes	Same level replacement	β-lactam
16	male	64	2023-03-14	Escherichia coli											2023-03-14	Escherichia coli											2023-03-14	urine: negative	Yes	Same level replacement	Quinolones
17	female	28	2020-07-14	negative															2020-07-13	negative									Yes	Same level replacement	β-lactam, Antiviral agent
18	male	67					2023-11-06	Klebsiella pneumoniae							2023-11-06	negative			2023-11-06	negative									No		β-lactam
19	female	59											2023-01-02	Eggerthia catenaformis, Parvimonas micra, Bulleidia extructa, Filifactor alocis	2022-12-30	negative									2022-12-30	negative			No		β-lactam, Glycopeptide
20	male	36	2021-09-20	negative									2021-09-20	negative	2021-09-17	negative													Yes	Same level replacement	β-lactam, Glycopeptide, Tetracyclines
21	male	57	2022-04-18	negative							2022-04-18	Peptostreptococcus stomatis, Streptococcus pneumoniae			2022-04-13	negative													Yes	Escalation	β-lactam
22	male	75	2022-02-27	negative					2022-02-27	Staphylococcus epidermidis, Enterococcus faecium, Enterobacter aerogenes, Proteus mirabilis					2022-02-22	negative					2022-02-23	Klebsiella variicola							Yes	De-escalation	β-lactam, Aminoglycosides, Quinolones
23	female	32	2023-04-09	negative			2023-04-11	Staphylococcus saprophyticus							2023-04-09	negative													Yes	De-escalation	β-lactam, Antiviral agent
24	male	72	2022-07-06	Streptococcus pneumoniae, Human alphaherpesvirus 1			2022-07-06	Human alphaherpesvirus 1													2022-07-03	Acinetobacter lwoffii							Yes	De-escalation	β-lactam, Glycopeptide, Antiviral agent
25	male	51	2023-04-19	negative	2023-04-21	Bifidobacterium longum, Actinomyces bouchesdurhonensis									2023-04-19	negative					2023-04-19	negative							Yes	Same level replacement	β-lactam
26	male	53	2023-05-05	Hepatitis B virus	2023-05-07	negative									2023-05-04	negative													Yes	Same level replacement	β-lactam
27	male	74	2022-03-13	negative			2022-03-13	negative	2022-03-13	Pseudomonas aeruginosa, Corynebacterium striatum, Aspergillus fumigatus					2022-03-14	negative					2022-03-14	Pseudomonas aeruginosa							No		β-lactam, Quinolones
28	male	56									2022-12-22	Bacteroides fragilis, Escherichia coli, Prevotella oris, Peptostreptococcus anaerobius			2022-12-17	negative							2022-12-17	negative					Yes	Escalation	β-lactam, Glycopeptide
29	male	60					2023-05-18	Streptococcus pneumoniae							2023-05-15	negative			2023-05-15	negative									No		β-lactam, Glycopeptide
30	female	65	2021-03-24	Helicobacter pylor											2021-03-24	negative													No		β-lactam, Quinolones, Antiviral agent
31	male	74	2023-04-22	Klebsiella pneumoniae	2023-04-24	Klebsiella pneumoniae									2023-04-21	Candida albicans	2023-04-21	Klebsiella pneumoniae											Yes	Same level replacement	β-lactam, Quinolones
32	male	48	2021-02-04	Klebsiella pneumoniae	2021-02-04	Klebsiella pneumoniae									2021-02-04	Klebsiella pneumoniae	2021-02-04	Klebsiella pneumoniae											No		β-lactam
33	male	68			2022-06-17	Candida tropicalis									2023-06-18	negative					2023-06-16	yeast-like fungi							No		β-lactam
34	male	82	2022-08-21	Corynebacterium striatum, Human betaherpesvirus 6B	2022-08-21	Corynebacterium striatum									2022-08-19	negative													Yes	Escalation	β-lactam, Glycopeptide
35	male	47					2021-09-17	negative											2021-09-17	negative									Yes	Same level replacement	β-lactam
36	male	65			2022-09-15	Mycobacterium massiliense									2022-09-14	negative					2022-09-14	yeast-like fungi							No		β-lactam, Quinolones
37	male	46	2022-01-03	Human alphaherpesvirus 1					2022-01-03	Staphylococcus haemolyticus, Human alphaherpesvirus 1	2022-01-03	Streptococcus salivarius																	Yes	Same level replacement	β-lactam, Quinolones, Glycopeptide
38	male	55	2022-11-15	negative											2022-11-15	negative					2022-11-15	negative					2022-11-15	urine: negative	No		Tetracyclines
39	male	64			2022-01-30	Pseudomonas aeruginosa											2022-01-30	Staphylococcus aureus，Pseudomonas aeruginosa											Yes	Same level replacement	β-lactam
40	female	45	2022-02-20	Staphylococcus haemolyticus													2022-02-20	Staphylococcus haemolyticus											Yes	De-escalation	β-lactam, Quinolones, Imidazole antifungal drugs
41	male	45	2022-02-20	negative	2022-02-20	Acinetobacter baumannii	2022-02-20	negative							2022-02-16	negative													Yes	Same level replacement	β-lactam, Tetracyclines
42	female	31	2022-09-30	Staphylococcus pasteur											2022-09-26	negative					2022-09-26	negative					2022-09-26	urine: negative	Yes	Same level replacement	β-lactam, Antiviral agent, Tetracyclines
43	male	51	2022-05-05	Klebsiella pneumoniae, Human alphaherpesvirus 1			2022-05-05	Corynebacterium matruchotii	2022-05-05	Klebsiella pneumoniae, Aspergillus fumigatus					2022-04-26	negative													Yes	Escalation	β-lactam, Glycopeptide
44	male	77	2021-12-31	negative					2021-12-31	Staphylococcus epidermidis, Candida parapsilosis					2021-12-24	negative											2021-12-24	bile: Escherichia coli	Yes	Escalation	β-lactam, Glycopeptide
45	female	62	2021-08-25	Escherichia coli	2021-08-25	Acinetobacter baumannii									2021-08-25	Escherichia coli	2021-08-25	Acinetobacter baumannii											Yes	Same level replacement	β-lactam
46	male	56	2022-12-24	negative			2022-12-26	Propionibacterium humerusii							2022-12-23	negative			2022-12-23	negative									Yes	Escalation	β-lactam
47	male	66	2021-12-23	Enterococcus faecium											2021-12-23	negative													Yes	Same level replacement	β-lactam
48	male	64	2022-06-04	negative	2022-06-04	Bacillus cereus group, Influenza A virus									2022-06-04	negative					2022-06-04	negative							Yes	De-escalation	β-lactam
49	female	67	2022-06-25	negative	2022-06-25	negative									2022-06-19	negative					2022-06-19	Klebsiella pneumoniae, Staphylococcus aureus					2022-06-19	urine: Enterococcus faecium	Yes	Escalation	β-lactam, Aminoglycosides, Echinocandins antifungal drugs
50	male	69	2021-11-12	Staphylococcus aureus											2021-11-12	Staphylococcus aureus													Yes	Same level replacement	β-lactam
51	male	79			2022-02-16	Pseudomonas aeruginosa, Candida tropicalis																							Yes	Same level replacement	β-lactam, Imidazole antifungal drugs
52	male	84	2023-04-19	Escherichia coli					2023-04-21	Escherichia coli					2023-04-17	negative													Yes	Same level replacement	β-lactam
53	male	74	2022-07-24	Mycolicibacterium cosmeticum	2022-07-24	Corynebacterium striatum, Stenotrophomonas maltophilia, Enterococcus faecalis, Staphylococcus haemolyticus, Elizabethkingia anophelis									2022-07-23	negative					2022-07-23	Corynebacterium striatum, Stenotrophomonas maltophilia							Yes	Same level replacement	quinolones, Glycopeptide
54	male	80			2023-03-27	Corynebacterium striatum, Acinetobacter baumannii, Enterococcus faecium, Candida glabrata																							Yes	Same level replacement	β-lactam, Triazole antifungals
55	male	50	2021-05-28	Enterococcus faecium, Escherichia coli	2021-05-28	Pseudomonas aeruginosa, Streptococcus pneumoniae, Klebsiella pneumoniae									2021-05-28	Enterococcus faecium	2021-05-28	Pseudomonas aeruginosa											Yes	Same level replacement	β-lactam, Antiviral agent
56	female	67	2021-08-02	Escherichia coli	2021-08-02	Staphylococcus aureus									2021-08-02	Escherichia coli	2021-08-02	Staphylococcus aureus											Yes	Same level replacement	β-lactam
57	male	82	2022-09-01	Enterococcus avium, Epstein Barr virus, Human alphaherpesvirus 1, Cytomegalovirus	2022-09-01	Enterococcus avium, Acinetobacter nosocomialis, Corynebacterium striatum, Human alphaherpesvirus 1									2022-08-27	negative	2022-09-02	Acinetobacter baumannii											Yes	Escalation	β-lactam, Glycopeptide
58	male	88							2022-12-22	Klebsiella pneumoniae					2022-12-11	negative	2022-12-12	Klebsiella pneumoniae，Candida albicans											No		β-lactam
59	female	55			2021-06-07	Acinetobacter baumannii											2021-06-07	Acinetobacter baumannii，Pseudomonas aeruginosa											Yes	Same level replacement	β-lactam
60	male	54	2022-11-04	negative	2022-11-05	Klebsiella aerogenes	2022-11-05	negative							2022-11-01	negative					2022-11-01	Klebsiella pneumoniae							No		β-lactam, Glycopeptide
61	female	71			2022-07-26	Candida albicans									2022-07-25	negative					2022-07-25	Candida albicans							Yes	Escalation	β-lactam, Imidazole antifungal drugs
62	male	65	2022-08-21	Corynebacterium striatum, Enterococcus faecium	2022-08-21	Stenotrophomonas maltophilia, Corynebacterium striatum, Enterococcus faecium									2022-08-15	Klebsiella pneumoniae					2022-08-15	yeast-like fungi							Yes	Escalation	β-lactam, Aminoglycosides, Oxazolidinone, Cyclodepsipeptide, Echinocandins antifungal drugs
63	female	86			2021-07-12	Staphylococcus aureus, Acinetobacter baumannii											2021-07-12	Candida albicans、Acinetobacter baumannii											Yes	Same level replacement	β-lactam
64	female	68	2021-08-15	Escherichia coli											2021-08-15	Escherichia coli													Yes	De-escalation	β-lactam, Glycopeptide
65	female	63	2023-04-21	Bacteroides vulgatus, Klebsiella pneumoniae, Escherichia coli, Streptococcus anginosus							2023-04-23	Bacteroides vulgatus, Streptococcus anginosus, Escherichia coli, Klebsiella pneumoniae			2023-04-20	negative							2023-04-20	Streptococcus anginosus, Klebsiella pneumoniae, Escherichia coli					No		β-lactam

## Sheet: Supplementary Tale 3
Supplementary Table 3. Microorganisms identified and antibiotic adjustment in the control group.
No.	Gender	Age (years)	Sampling Type	Culture results	Sampling Type	Culture results	Whether the antibiotic was adjusted	Antibiotic adjustment status	Typeofantimicrobial
1	2	31	Blood	Achromobacter xylosoxidans	Sputum	Staphylococcus aureus	No		β-lactam, Quinolones, Glycopeptide
2	2	71	Sputum	Yeast-like fungi			Yes	Same level replacement	β-lactam
3	2	68	Ascites	Escherichia coli; Candida albicans			Yes	Escalation	β-lactam, Aminoglycosides, Imidazole antifungal drugs
4	2	26	Blood	Staphylococcus capitis			No		β-lactam
5	2	45	Sputum	Acinetobacter baumannii			Yes	Same level replacement	β-lactam, Tetracyclines
6	2	85	Sputum+Blood+Urine	Citrobacter koseri			No		β-lactam
7	2	63	Blood	Staphylococcus epidermidis			No		β-lactam, Glycopeptide, Aminoglycosides, Oxazolidinone
8	2	81					No		β-lactam, Metronidazole
9	2	67	Ascites	Candida albicans	Sputum	Haemophilus influenzae	No		β-lactam
10	2	74	Pus	Escherichia coli		Candida albicans	No		β-lactam
11	2	58	BALF	Klebsiella pneumoniae			No		β-lactam, Glycopeptide, Echinocandins antifungal drugs
12	2	38	Ascites	Aeromonas caviae			No		β-lactam
13	2	59	Ascites	Escherichia coli	Perianal fluid	Streptococcus oralis	Yes	Same level replacement	β-lactam, Glycopeptide, Aminoglycosides, Metronidazole
14	2	82	Drainage fluid	Escherichia coli; Enterococcus faecalis; Candida albicans			Yes	Escalation	β-lactam, Quinolones, Aminoglycosides, Imidazole antifungal drugs
15	2	64	Sputum	Acinetobacter baumannii; Stenotrophomonas maltophilia			Yes	Same level replacement	β-lactam
16	2	67	Ascites	Candida albicans			No		β-lactam
17	1	16					Yes	Same level replacement	β-lactam
18	2	41					No		β-lactam
19	2	78	Sputum	Staphylococcus aureus	Blood	Enterococcus faecium	No		β-lactam, Glycopeptide, Quinolones
20	2	54					Yes	Same level replacement	β-lactam, Quinolones
21	2	90	Sputum	Escherichia coli			Yes	Same level replacement	β-lactam, Quinolones, Aminoglycosides
22	1	88					No		β-lactam
23	1	78	Urine+Blood	Escherichia coli			Yes	Same level replacement	β-lactam, Quinolones
24	2	77	Bile	Escherichia coli			Yes	Escalation	β-lactam, Glycopeptide, Tetracyclines, Polypeptide, Aminoglycosides
25	2	63	Sputum	Staphylococcus aureus			No		β-lactam
26	2	29	Sputum	Klebsiella pneumoniae			Yes	Same level replacement	β-lactam
27	1	56					Yes	Same level replacement	β-lactam
28	2	71	Sputum	Klebsiella oxytoca; Klebsiella aerogenes; Staphylococcus aureus; Stenotrophomonas maltophilia; Pseudomonas aeruginosa; Klebsiella pneumoniae	Urine	Escherichia coli	Yes	Same level replacement	β-lactam, Quinolones
29	2	54	Ascites	Escherichia coli; Enterococcus faecium; Candida albicans; Stenotrophomonas maltophilia			Yes	Escalation	β-lactam, Quinolones, Glycopeptide, Tetracyclines, Aminoglycosides,
30	2	58					Yes	Escalation	β-lactam, Quinolones, Macrolide, Glycopeptide
31	2	65	Blood	Pseudomonas aeruginosa			No		β-lactam, Quinolones
32	2	71	Urine+Blood	Enterobacter cloacae	Urine	Enterococcus faecium	No		β-lactam, Aminoglycosides
33	1	75	Bile+Blood	Escherichia coli			Yes	Same level replacement	β-lactam, Quinolones
34	2	64					No		β-lactam, Macrolide
35	1	70	Sputum	Proteus mirabilis			Yes	Escalation	β-lactam, Tetracyclines, Oxazolidinone, Echinocandins antifungal drugs
36	1	72					No		β-lactam, Glycopeptide, Aminoglycosides
37	2	71	Urine+Blood	Candida albicans+Enterococcus faecium			No		β-lactam, Glycopeptide, Imidazole antifungal drugs
38	2	49	Sputum	Stenotrophomonas maltophilia			Yes	Escalation	β-lactam, Quinolones
39	2	50	Sputum	Stenotrophomonas maltophilia			Yes	Same level replacement	β-lactam, Quinolones
40	1	68					No		β-lactam
41	2	74	Drainage fluid	Enterococcus avium			Yes	Same level replacement	β-lactam
42	1	40	Drainage fluid	Escherichia coli			No		β-lactam, Aminoglycosides
43	1	80	Sputum	Serratia marcescens			Yes	Same level replacement	β-lactam, Oxazolidinone
44	2	72					Yes	De-escalation	β-lactam, Quinolones
45	1	23	Blood	Enterococcus faecalis			Yes	De-escalation	β-lactam, Glycopeptide
46	1	78					No		β-lactam
47	1	29					No		β-lactam, Quinolones
48	2	85	Blood	Klebsiella pneumoniae			Yes	Same level replacement	β-lactam
49	2	50	Sputum+Blood	Klebsiella pneumoniae			Yes	Same level replacement	β-lactam, Glycopeptide
50	2	53	Ascites	Escherichia coli; Enterococcus hirae			No		β-lactam, Glycopeptide
51	2	42	Sputum	Pseudomonas aeruginosa			Yes	Same level replacement	β-lactam, Glycopeptide, Quinolones, Echinocandins antifungal drugs
52	2	78	Sputum+Blood+Catheter	Staphylococcus aureus	Sputum	Acinetobacter nosocomialis	No		β-lactam, Quinolones
53	1	55	Urine+Blood	Escherichia coli			No		β-lactam
54	2	42	Urine	Enterococcus faecium			Yes	Same level replacement	β-lactam, Quinolones, Glycopeptide, Aminoglycosides
55	2	75	Sputum	Yeast-like fungi	Urine	Candida albicans	No		β-lactam, Quinolones
56	1	61	Blood	Escherichia coli			No		β-lactam, Aminoglycosides
57	1	59	Sputum	Escherichia coli+Staphylococcus aureus; Stenotrophomonas maltophilia	Urine	Escherichia coli	Yes	Same level replacement	β-lactam, Aminoglycosides, Quinolones
58	1	64	Sputum	Staphylococcus aureus; Escherichia coli			Yes	Same level replacement	β-lactam, Quinolones, Glycopeptide, Oxazolidinone
59	2	79	Sputum	Acinetobacter baumannii; MRSA; Aspergillus fumigatus; Candida albicans			Yes	Escalation	β-lactam, Polypeptide, Tetracyclines, Azole antifungals
60	2	77	Ascites+BALF	Klebsiella pneumoniae			Yes	Escalation	β-lactam, Glycopeptide
61	1	60	Urine	Enterococcus faecium			No		β-lactam, Glycopeptide
62	1	69	Urine+Blood	Escherichia coli			No		β-lactam
63	1	69	Sputum	Candida albicans	Blood	Candida glabrata	Yes	Same level replacement	β-lactam, Quinolones, Imidazole antifungal drugs
64	1	52	Pus	Pseudomonas aeruginosa			Yes	De-escalation	β-lactam, Quinolones
65	2	72	Drainage fluid	Escherichia coli; Pseudomonas aeruginosa; Candida parapsilosis	Sputum	Pseudomonas aeruginosa; Stenotrophomonas maltophilia	Yes	Escalation	β-lactam, Echinocandins antifungal drugs, Glycopeptide, Tetracyclines, Aminoglycosides, Metronidazole
